# Supplementary material for: Characterisation of pancreatic lipase inhibitors from Brassica rapa L. ssp. chinensis
Source: Royal Society of Chemistry journal article supplement (doi:10.1039/d4fo02247e), 2024-01-01
Supplement: d4fo02247e1.pdf [file d4fo02247e1.pdf]

**Characterisation of pancreatic lipase inhibitors from *Brassica rapa* L. ssp.  
*Chinensis***

Joanne Yi Hui Toy <sup>a</sup>, Yu yan Lim <sup>a</sup>, Habiba Shalash <sup>c</sup>, Dejian Huang <sup>a, b, \*</sup>

<sup>a</sup> *Department of Food Science & Technology, National University of Singapore, Singapore  
117542, Singapore*

<sup>b</sup> *National University of Singapore (Suzhou) Research Institute, 377 Lin Quan Street, Suzhou  
Industrial Park, Suzhou, Jiangsu 215123, PR China*

<sup>c</sup> *Wageningen University & Research, Droevendaalsesteeg 4, 6708 PB Wageningen, The  
Netherlands*

\* *Corresponding author: Email: [dejian@nus.edu.sg](mailto:dejian@nus.edu.sg)*

**Supplementary figures**

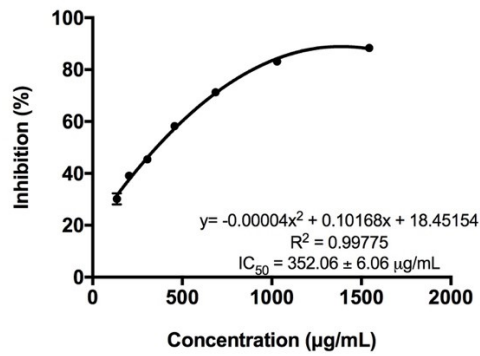

**Figure S1:** Dose-response curve of PL inhibition against concentration of naibai extract (a) DCM extract.

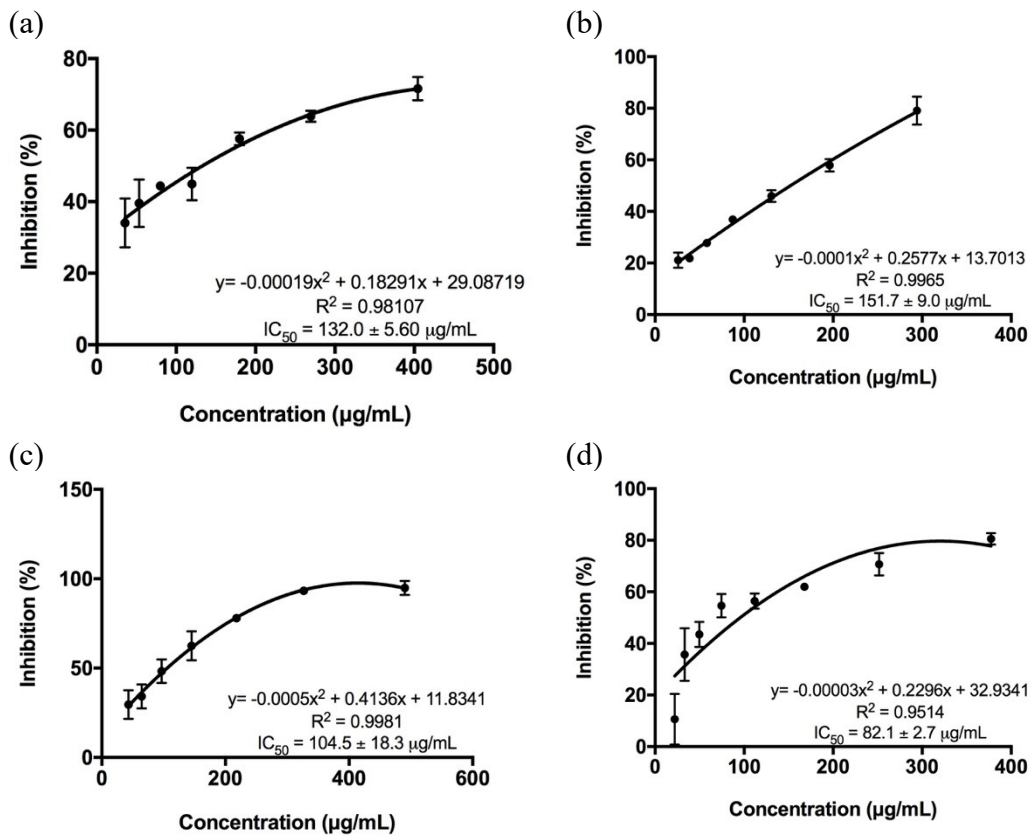

**Figure S2:** Dose-response curve of PL inhibition against different concentration of *Brassica rapa ssp. chinensis* extract (a) NB1, (b) NB2, (c) NB3 and (d) NB4.

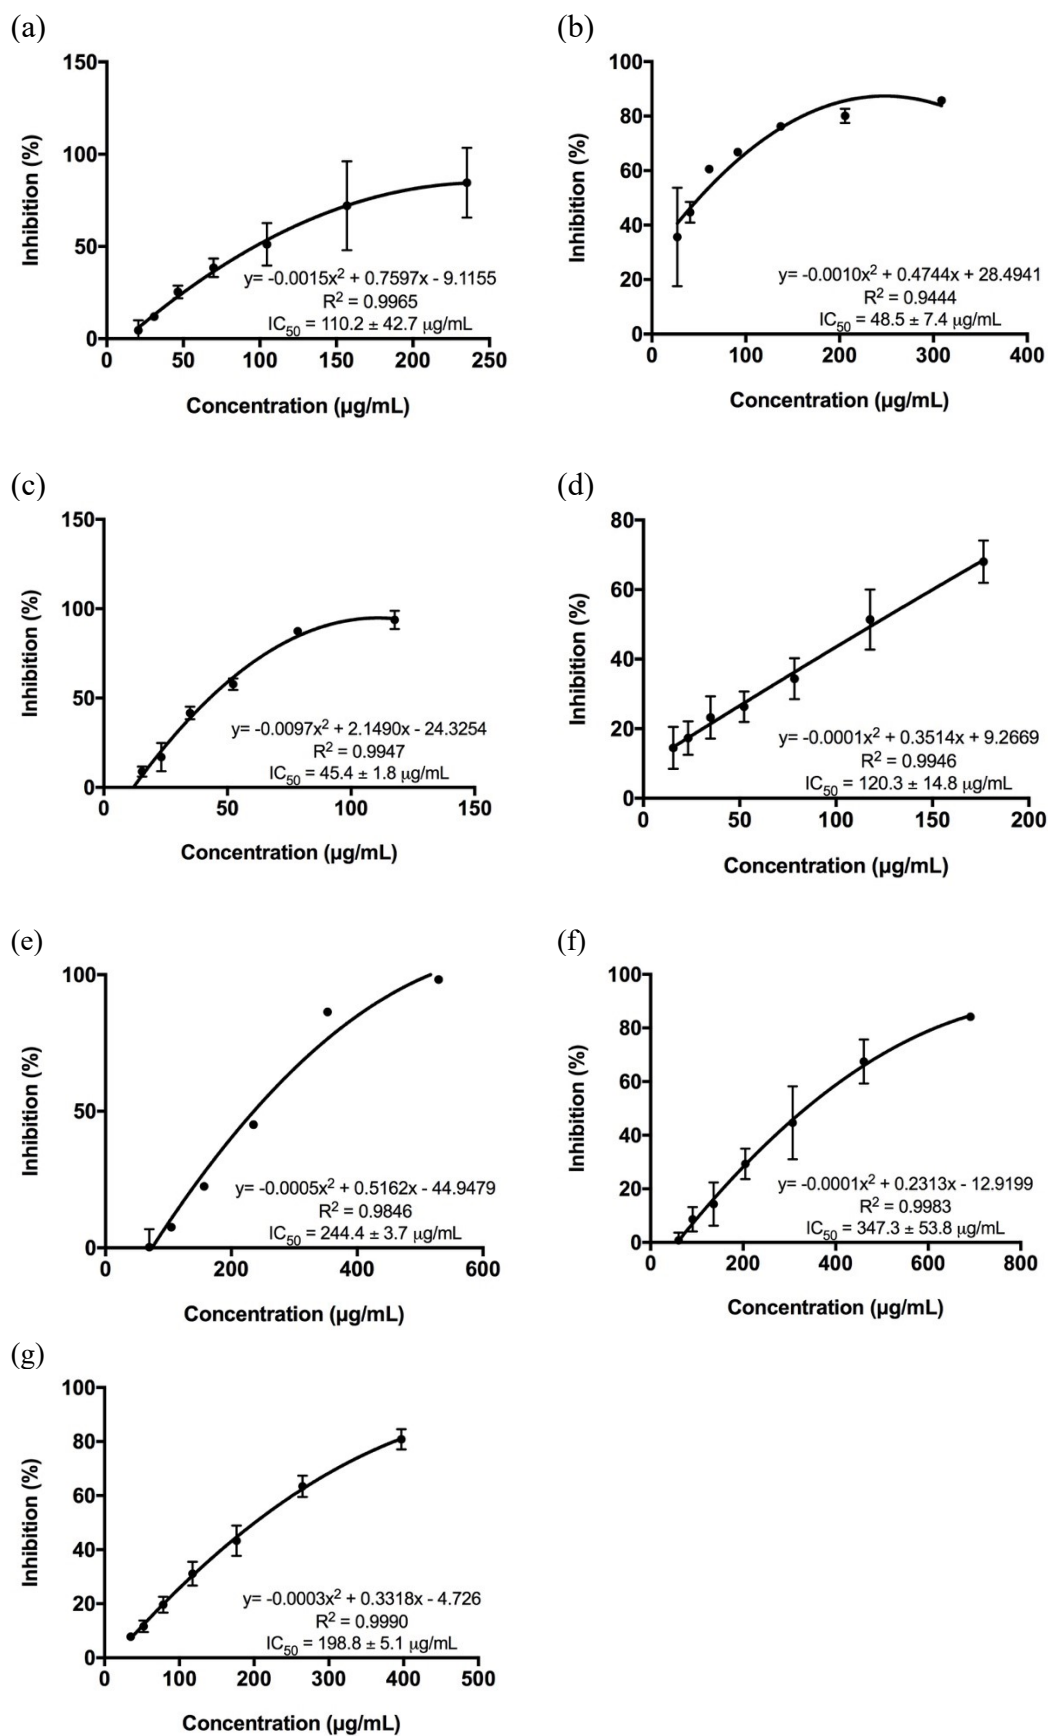

**Figure S3:** Dose-response curve of PL inhibition against different concentration of *Brassica rapa* ssp. *chinensis* extract after semi-preparative HPLC (a) NB4.1, (b) NB4.2, (c) NB4.3, (d) NB4.4, (e) NB4.5, (f) NB4.6, (g) NB4.7.

## Mass Spectrum SmartFormula Report

|                 |                      |                        |                                                        |
|-----------------|----------------------|------------------------|--------------------------------------------------------|
| Sample Name     | Nalbai4.2            | Data File              | D:\MassHunter\Data\External\FST\20210817\Nalbai4_2-1.d |
| Instrument Name | Agilent 6546 LC-QTOF | IRM Calibration Status | Success                                                |
| Acq Method      | MS Scan_union-1.m    | Acquired Time          | 17/8/2021 12:11:27 PM (UTC+08:00)                      |
| Comment         | A/P Huang Dejian     | Operator               |                                                        |

| Meas. m/z | # | Formula        | Calc. Mass | Err [ppm] |
|-----------|---|----------------|------------|-----------|
| 769.486   | 1 | C43 H70 Na O10 | 769.4861   | 0.13      |

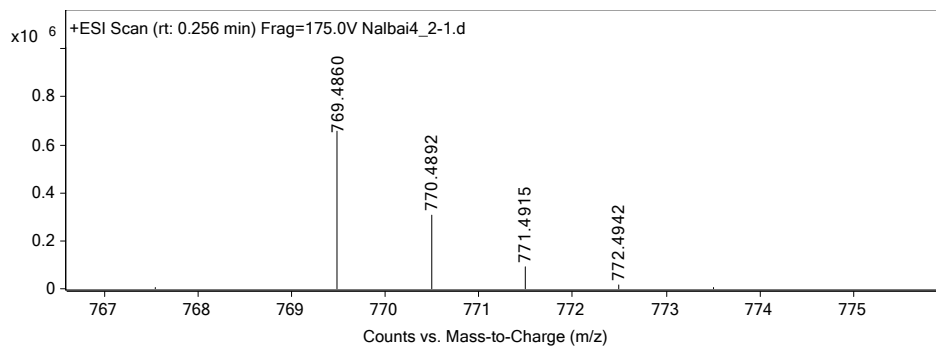

Page 1 of 1

Printed at 12:31 PM on 20-Aug-2021

**Figure S4: HR-ESIMS of NB4.2 (Cationic mode).**

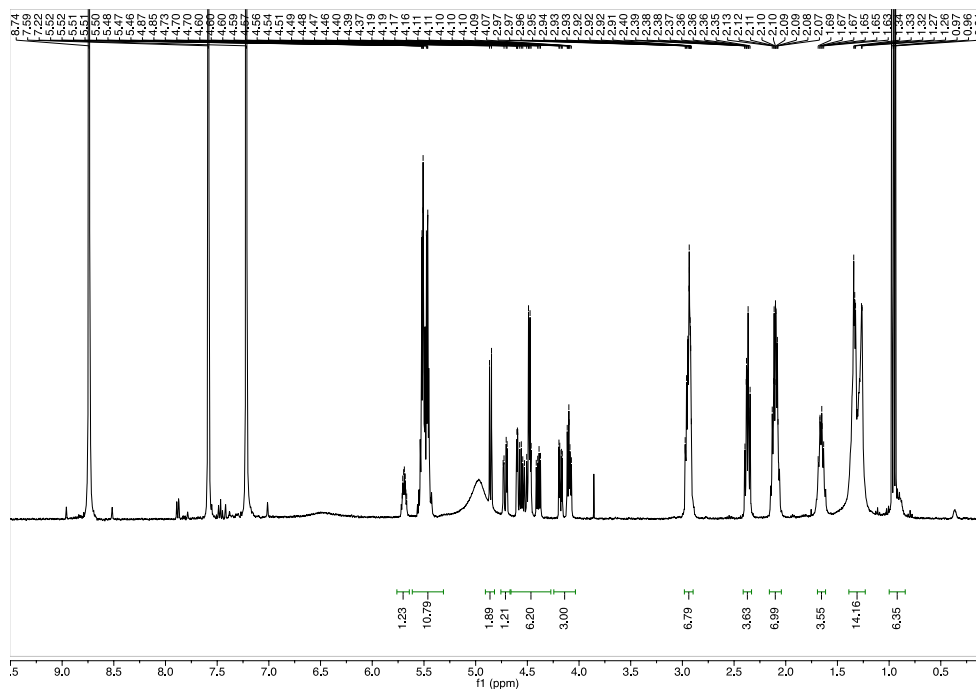

**Figure S5: <sup>1</sup>H NMR spectrum of NB4.2 in pyridine-d<sub>5</sub>**

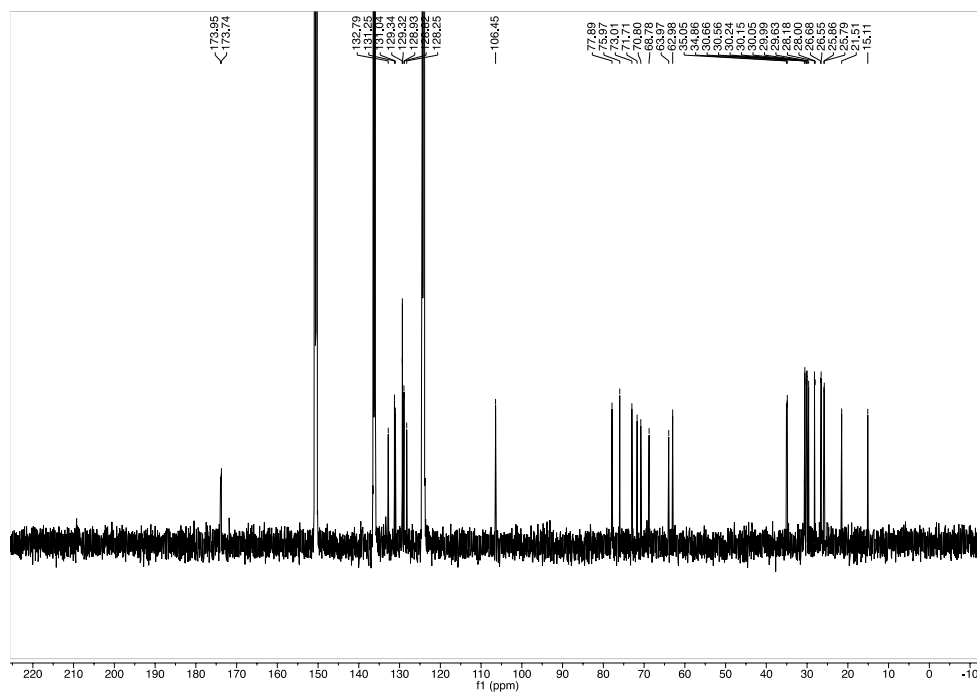

Figure S6:  $^{13}\text{C}$  NMR spectrum of NB4.2 in pyridine- $\text{d}_5$

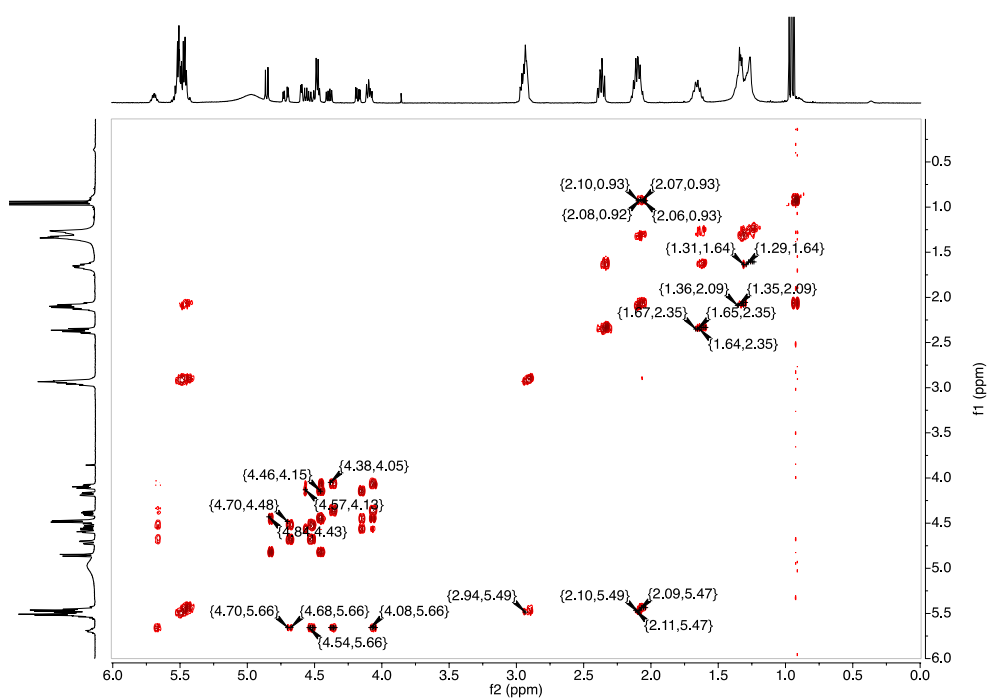

Figure S7: COSY NMR spectrum of NB4.2 in pyridine- $\text{d}_5$

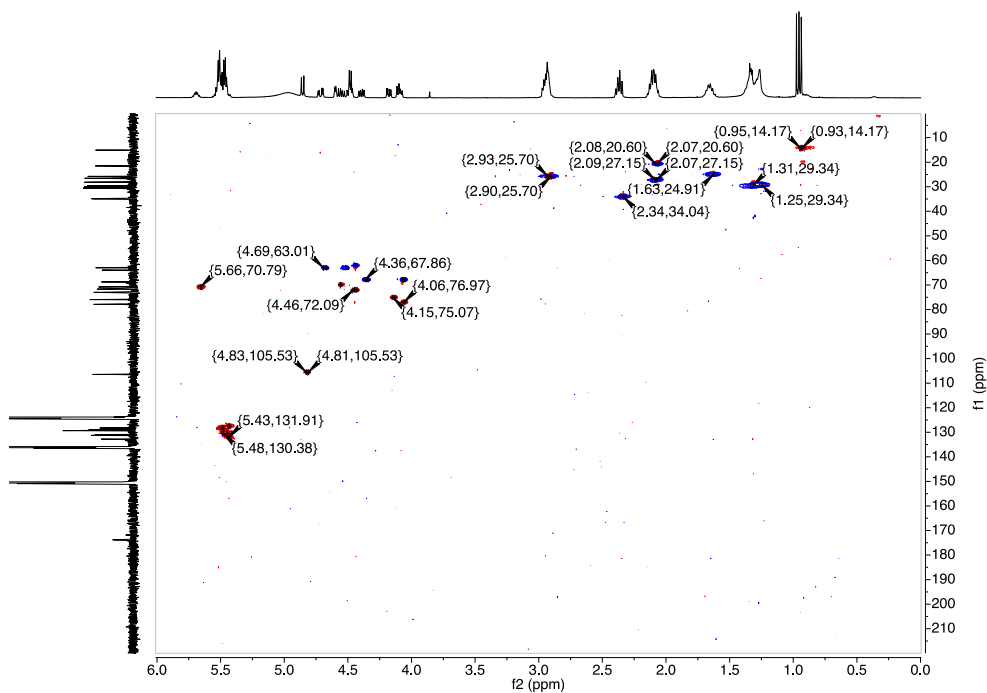

Figure S8: HSQC NMR spectrum of NB4.2 in pyridine-d<sub>5</sub>

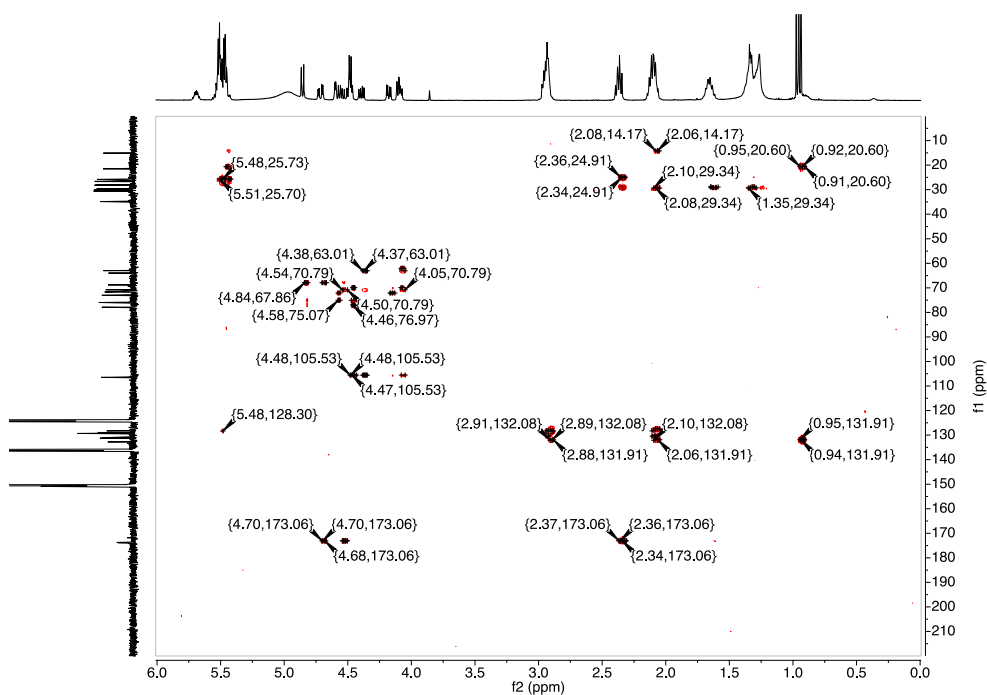

Figure S9: HMBC NMR spectrum of NB4.2 in pyridine-d<sub>5</sub>

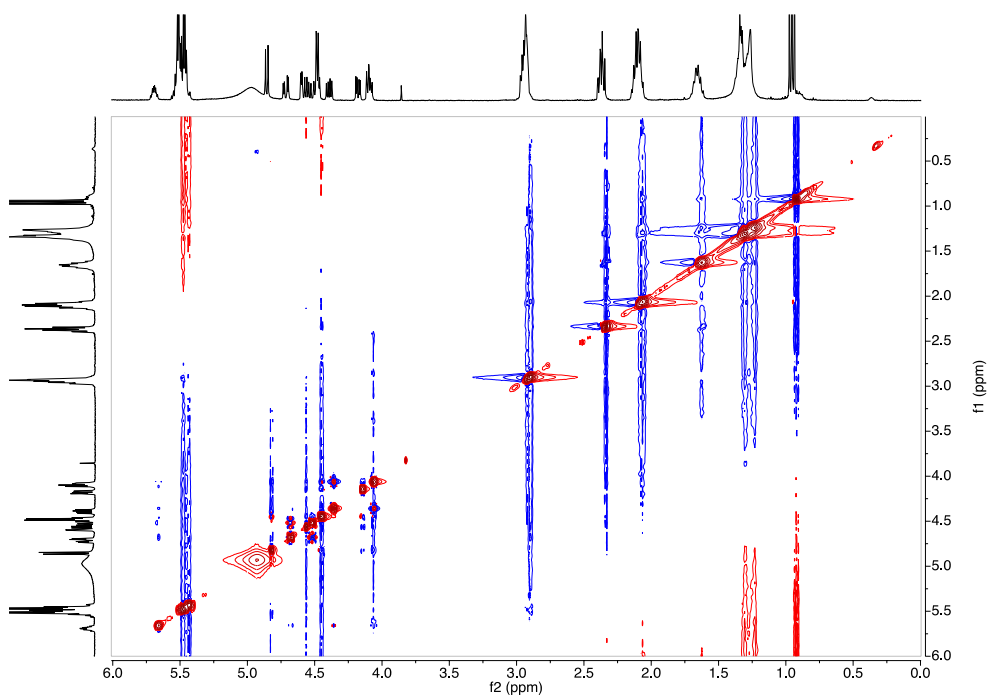

**Figure S10:** NOESY NMR spectrum of NB4.2 in pyridine-d<sub>5</sub>

Mass Spectrum SmartFormula Report

|                 |                      |                        |                                                      |
|-----------------|----------------------|------------------------|------------------------------------------------------|
| Sample Name     | Nalbai4.5            | Data File              | D:\MassHunter\Data\External\FST\20210817\Nalbai4_5.d |
| Instrument Name | Agilent 6546 LC-QTOF | IRM Calibration Status | Success                                              |
| Acq Method      | MS Scan_union-1.m    | Acquired Time          | 17/8/2021 12:04:09 PM (UTC+08:00)                    |
| Comment         | A/P Huang Dejian     | Operator               |                                                      |

| Meas. m/z | # | Formula     | Calc. Mass | Err [ppm] |
|-----------|---|-------------|------------|-----------|
| 797.518   | 1 | C47 H73 O10 | 797.5198   | 2.26      |
| 797.518   | 1 | C54 H69 O5  | 797.514    | 5.02      |

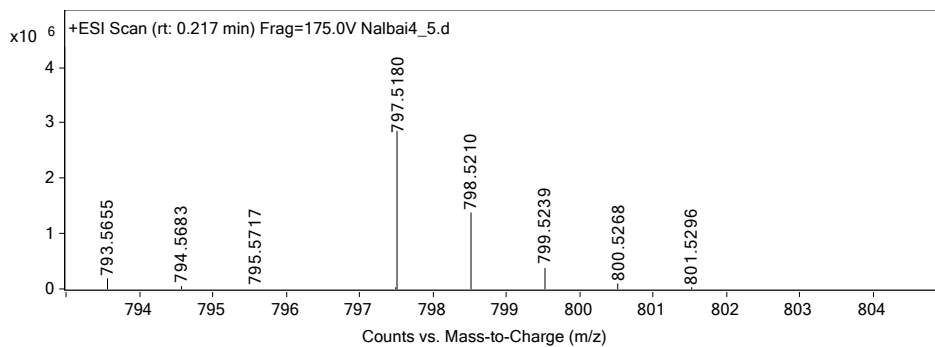

**Figure S11:** HR-ESIMS of NB4.5 (Cationic mode)

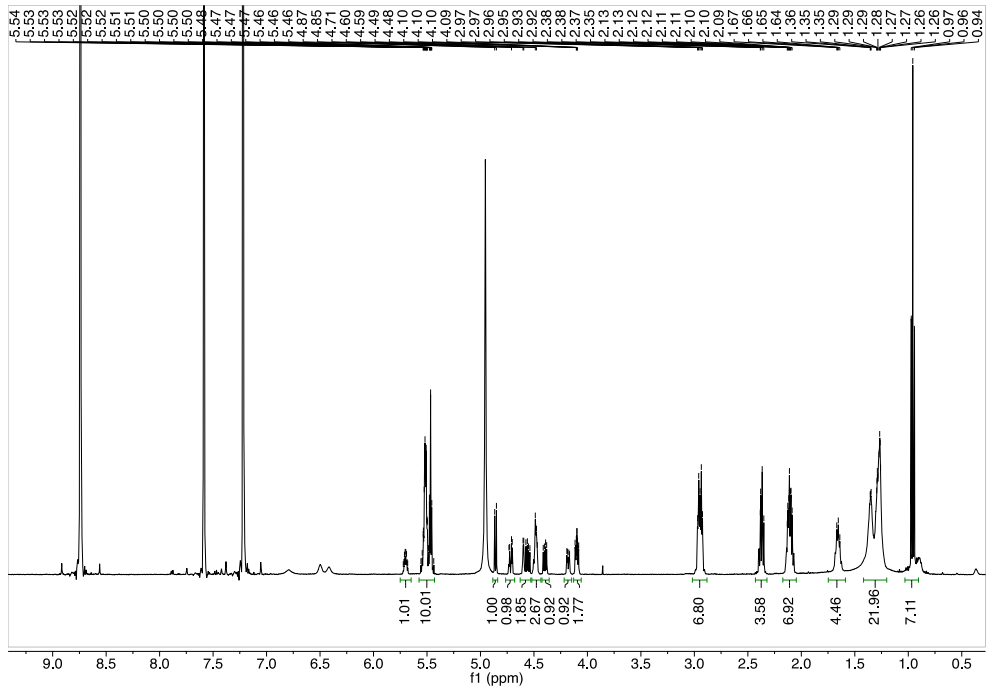

Figure S12:  $^1\text{H}$  NMR spectrum of NB4.5 in pyridine- $\text{d}_5$

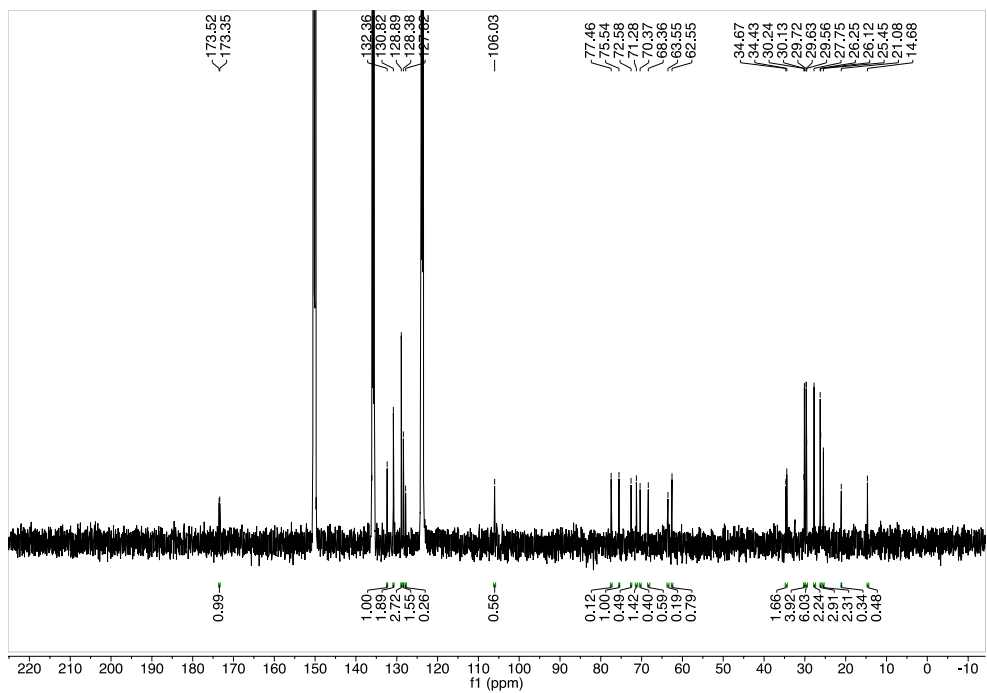

Figure S13:  $^{13}\text{C}$  NMR spectrum of NB4.5 in pyridine- $\text{d}_5$



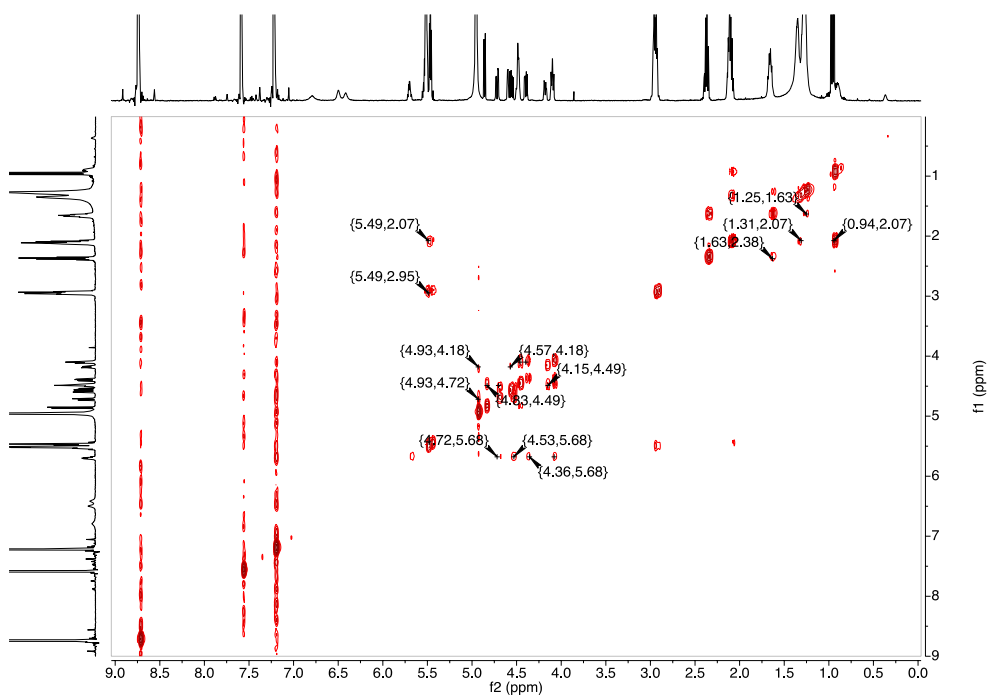

Figure S14: COSY NMR spectrum of NB4.5 in pyridine-d<sub>5</sub>

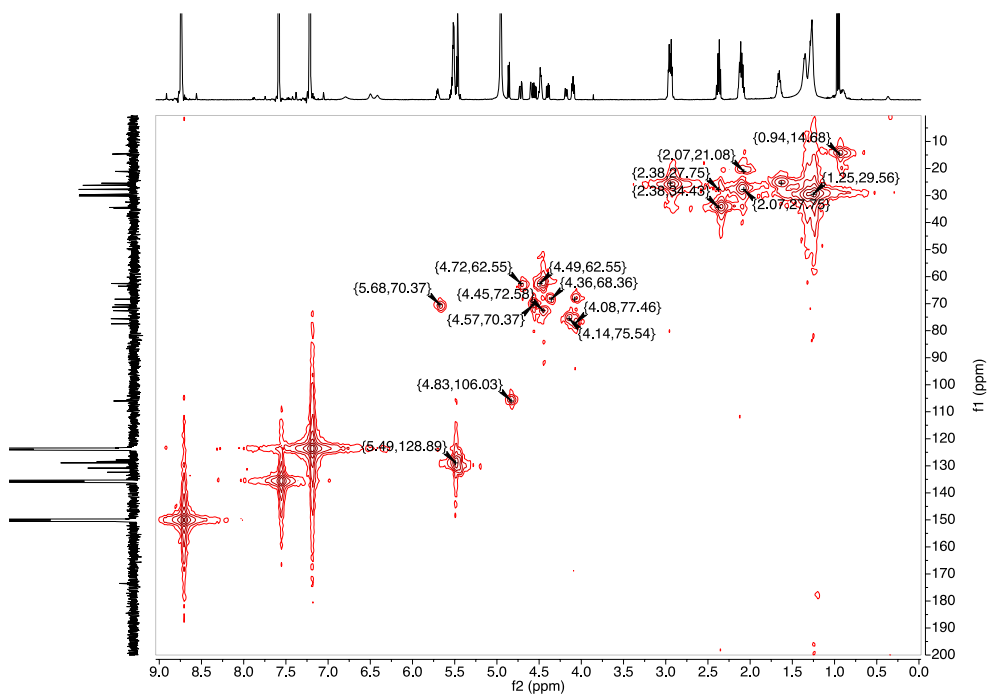

Figure S15: HSQC NMR spectrum of NB4.5 in pyridine-d<sub>5</sub>

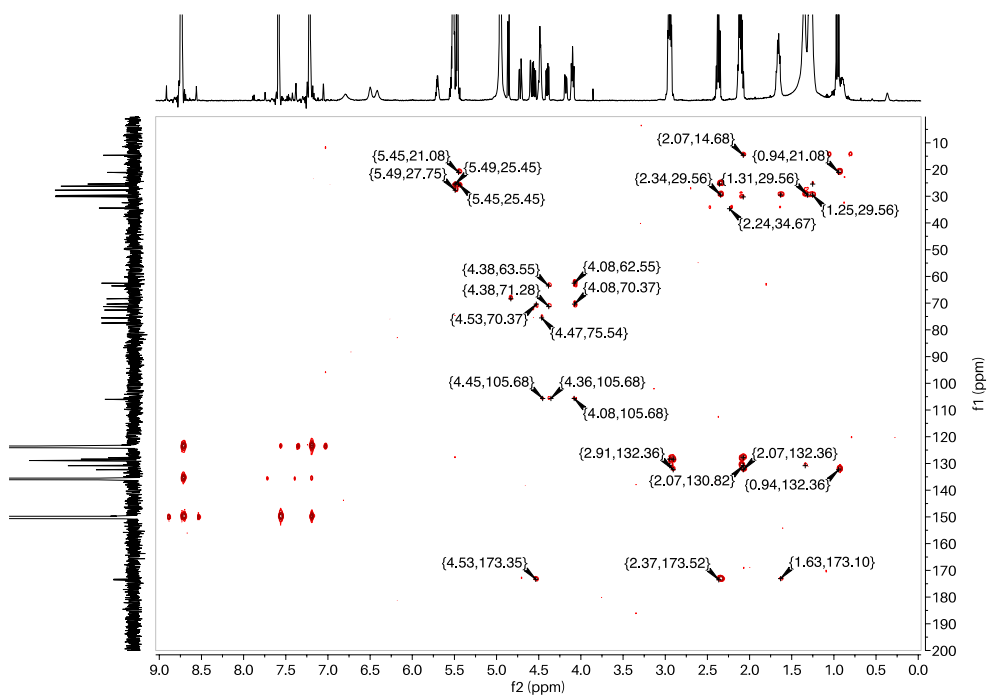

Figure S16: HMBC NMR spectrum of NB4.5 in pyridine-d<sub>5</sub>

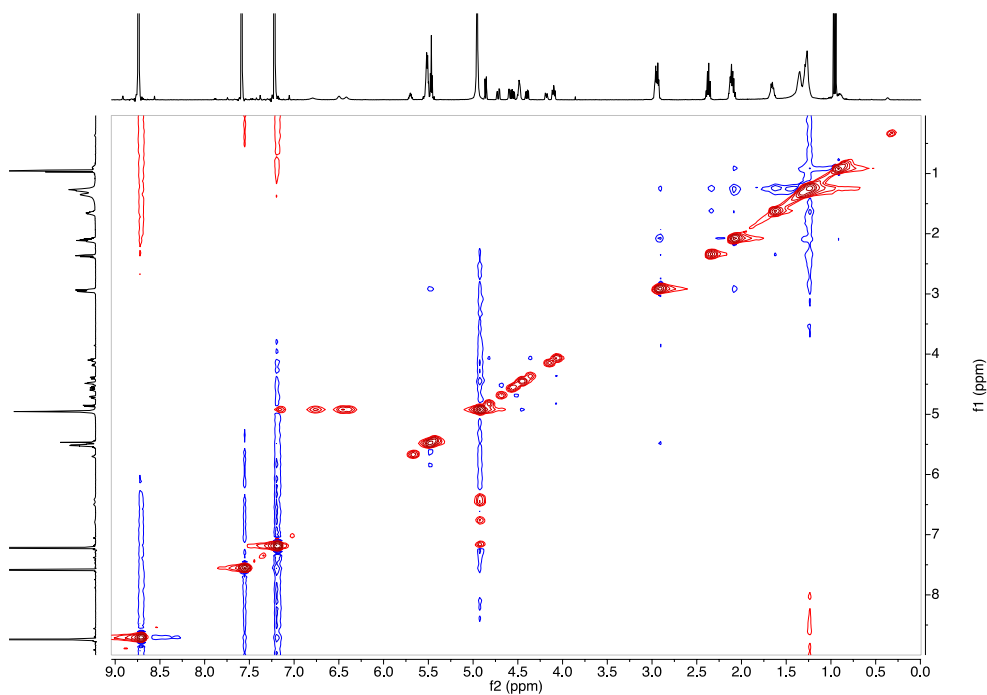

Figure S17: NOESY NMR spectrum of NB4.5 in pyridine-d<sub>5</sub>

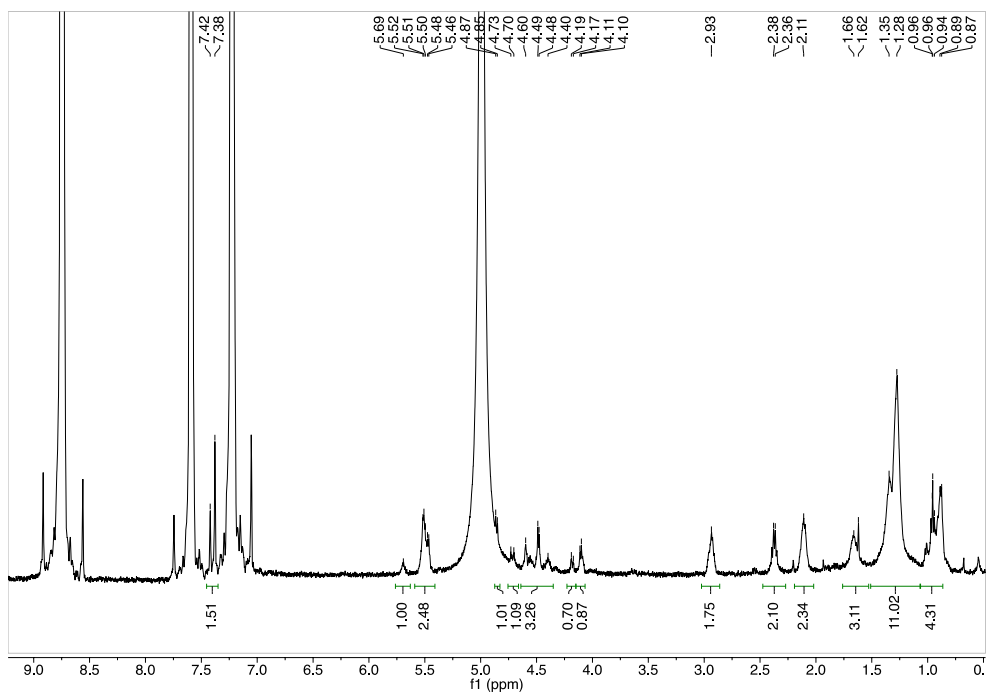

Figure S18:  $^1\text{H}$  NMR spectrum of NB4.4 in  $\text{pyridine-d}_5$

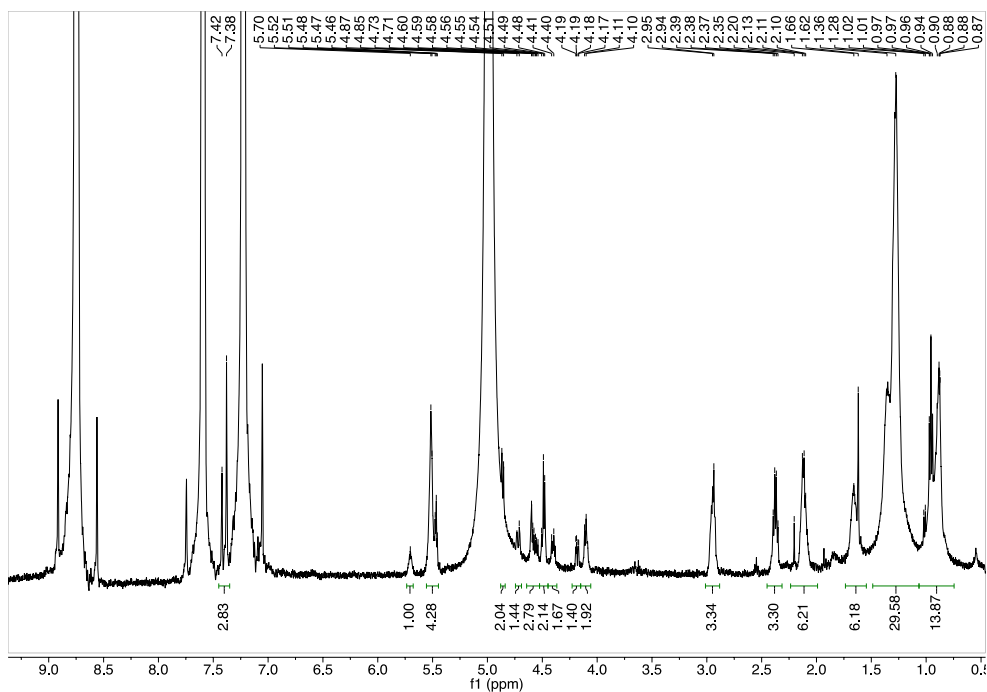

Figure S19:  $^1\text{H}$  NMR spectrum of NB4.6 in  $\text{pyridine-d}_5$

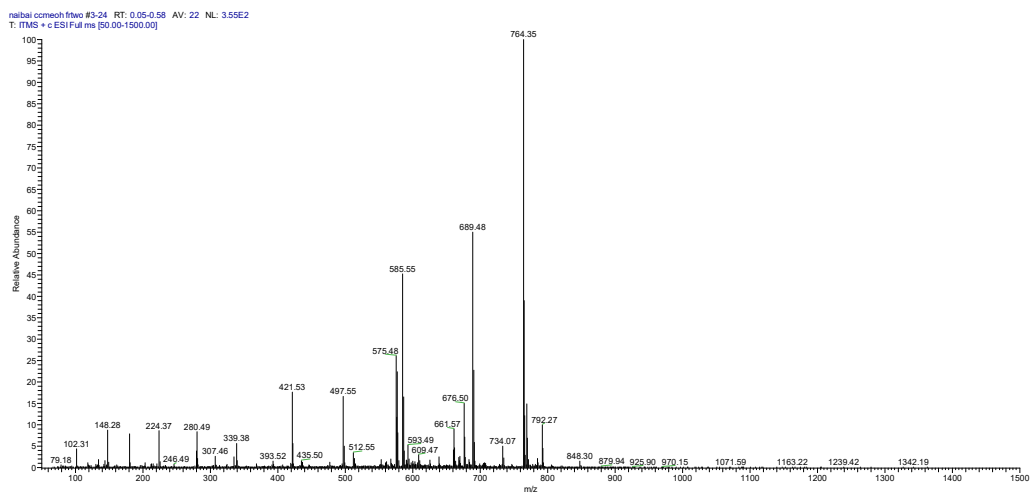

**Figure S20: ESI-MS spectrum of NB4.2 (Cationic mode)**

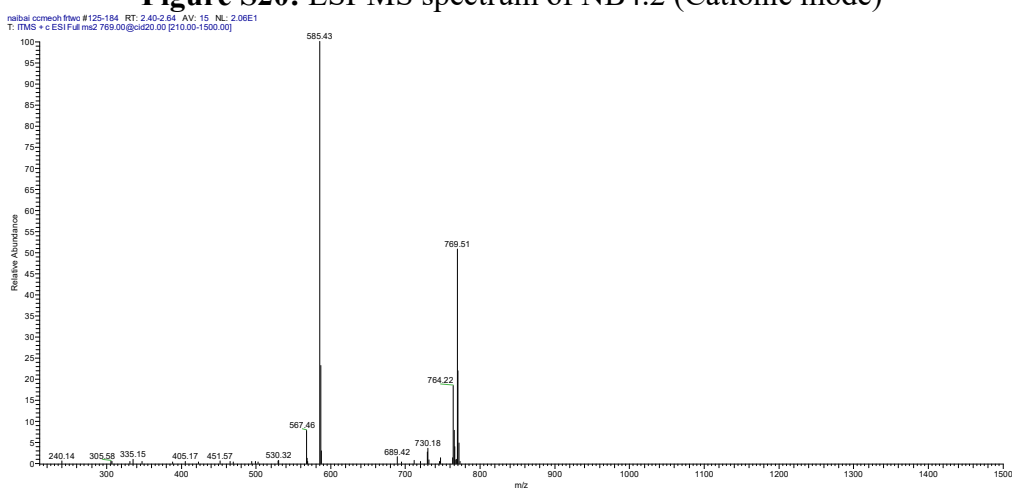

**Figure S21: ESI-MS/MS spectrum of  $m/z$  769 from NB4.2 (Cationic mode)**

|                    |                        |                               |                        |                      |                                  |
|--------------------|------------------------|-------------------------------|------------------------|----------------------|----------------------------------|
| <b>Sample Name</b> | NB4.4                  | <b>Instrument Name</b>        | Instrument 1           | <b>Operator</b>      | WLK                              |
| <b>Inj Vol</b>     | 5                      | <b>IRM Calibration Status</b> | Success                | <b>Data Filename</b> | NB4.4_msms.d                     |
| <b>ACQ Method</b>  | MS Scan_union_APCI-1.m | <b>Comment</b>                | FST, Prof Huang Dejian | <b>Acquired Time</b> | 28/7/2022 4:47:17 PM (UTC+08:00) |

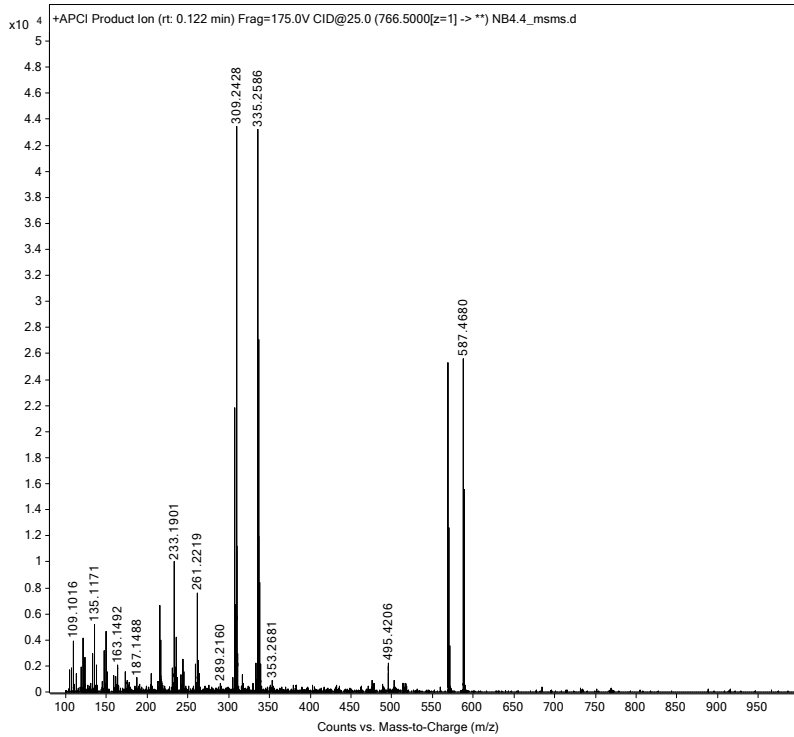

**Figure S22:** APCI-MS/MS spectrum of  $m/z$  766 from NB4.4 (Cationic mode)

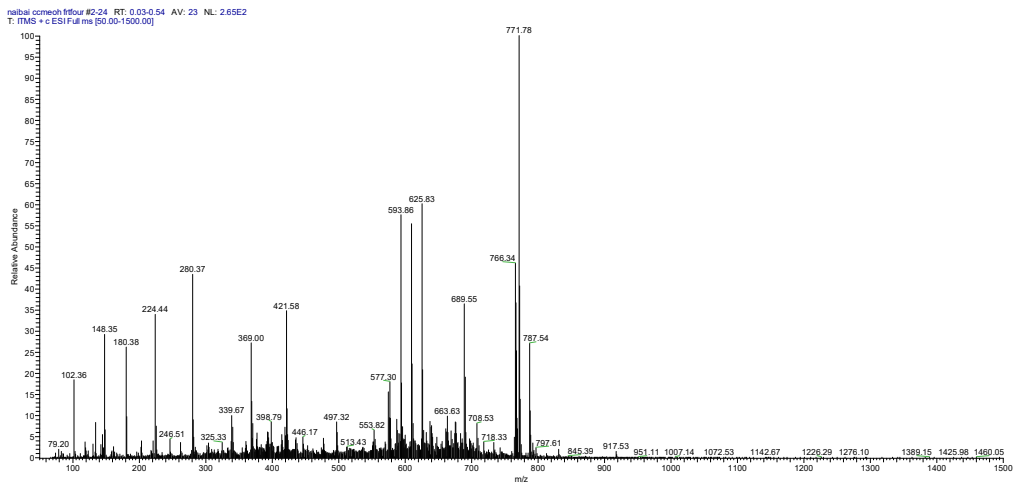

**Figure S23:** ESI-MS spectrum of NB4.4 (Cationic mode)

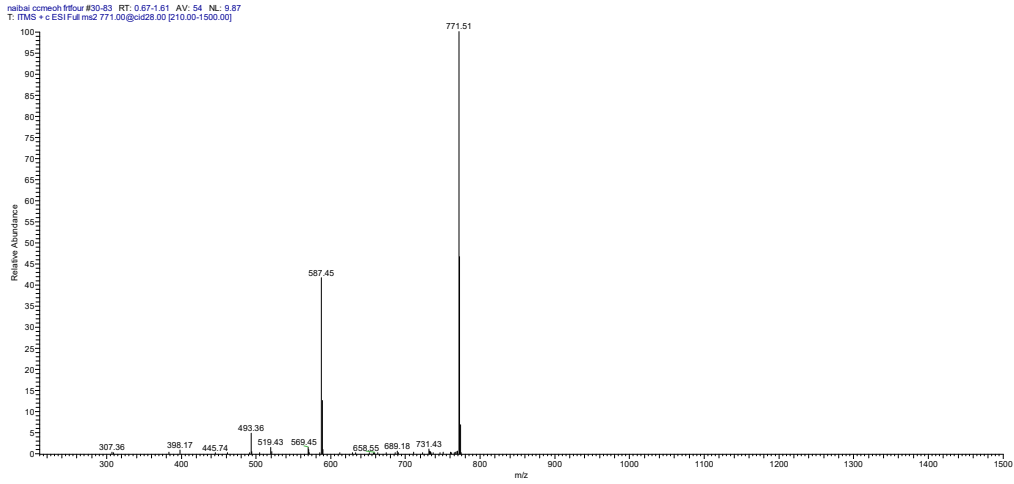

**Figure S24:** ESI-MS/MS spectrum of  $m/z$  771 from NB4.4 (Cationic mode)

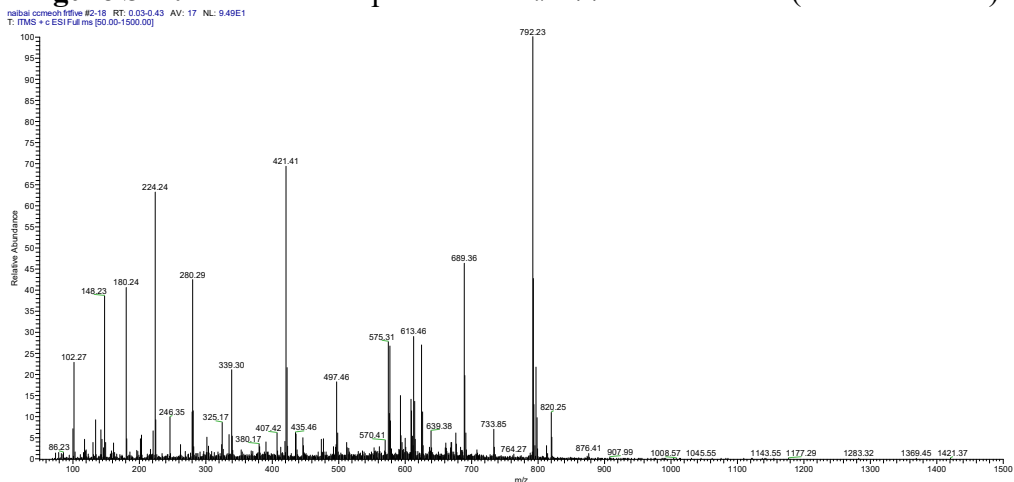

**Figure S25:** ESI-MS spectrum of NB4.5 (Cationic mode)

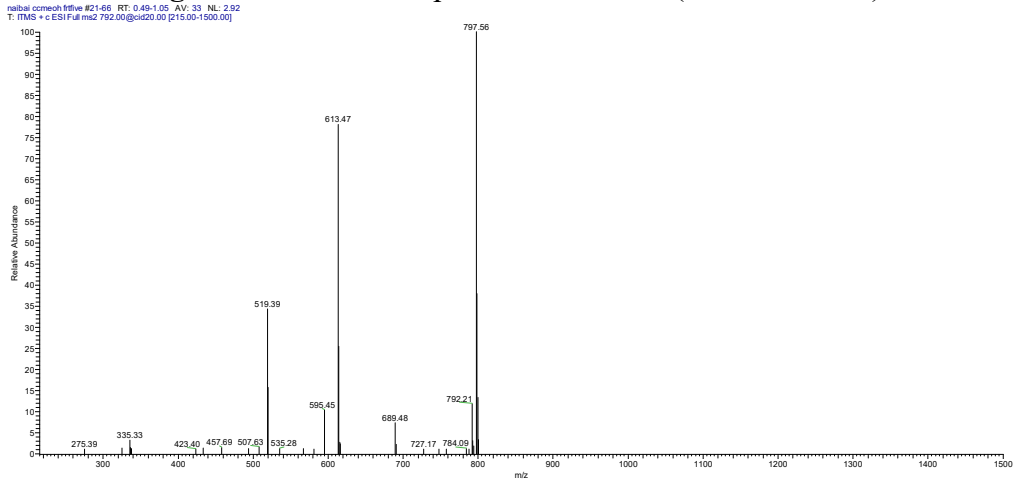

**Figure S26:** ESI-MS/MS spectrum of  $m/z$  792 from NB4.5 (Cationic mode)

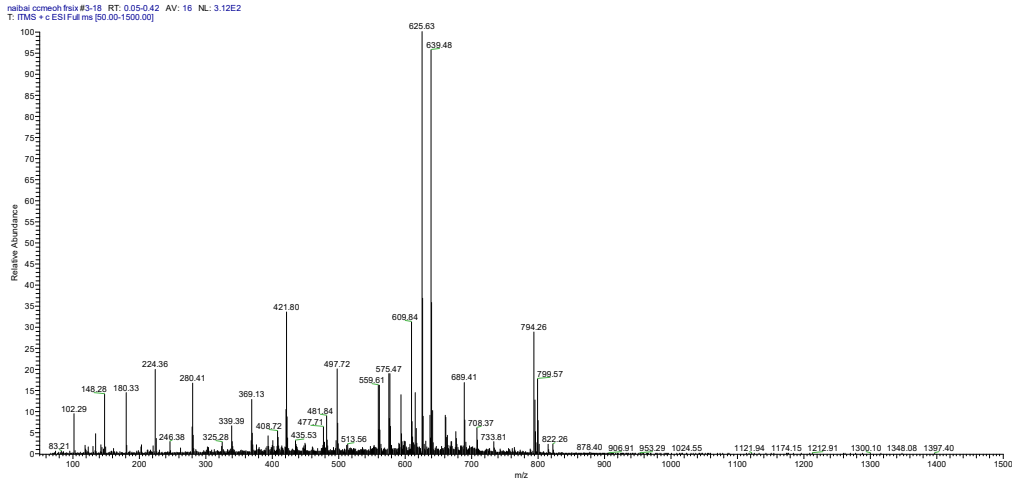

**Figure S27: ESI-MS spectrum of NB4.6 (Cationic mode)**

|             |                        |                        |                        |               |                                  |
|-------------|------------------------|------------------------|------------------------|---------------|----------------------------------|
| Sample Name | NB4.6                  | Instrument Name        | Instrument 1           | Operator      | WLK                              |
| Inj Vol     | 10                     | IRM Calibration Status | Success                | Data Filename | NB4.6_msms1.d                    |
| ACQ Method  | MS Scan_union_APCI-1.m | Comment                | FST, Prof Huang Dejian | Acquired Time | 28/7/2022 5:09:07 PM (UTC+08:00) |

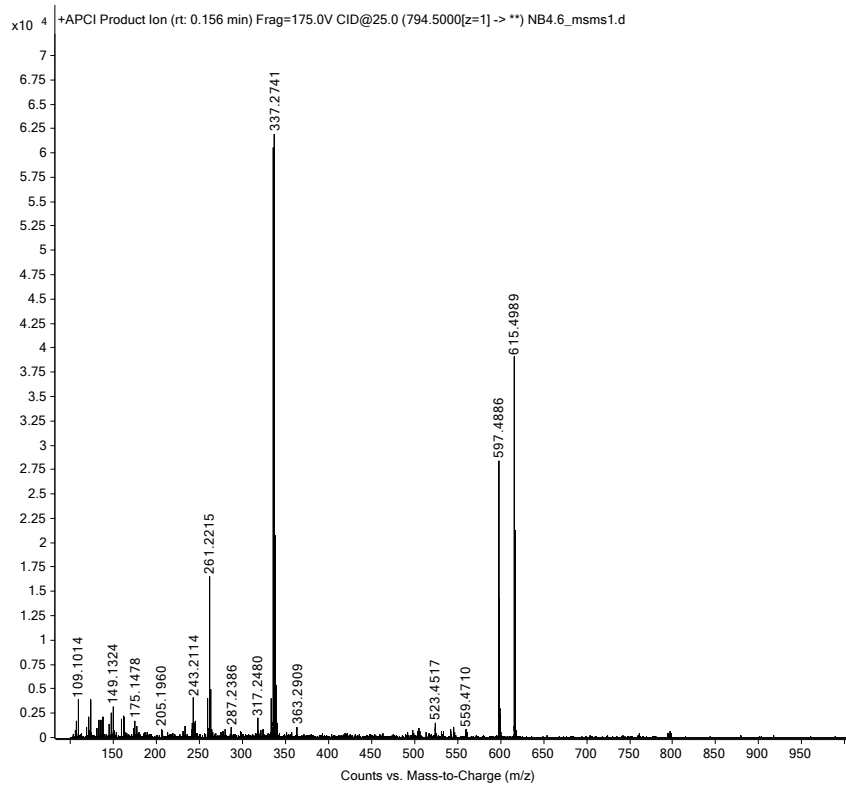

**Figure S28: APCI-MS/MS spectrum of  $m/z$  794 from NB4.6 (Cationic mode)**

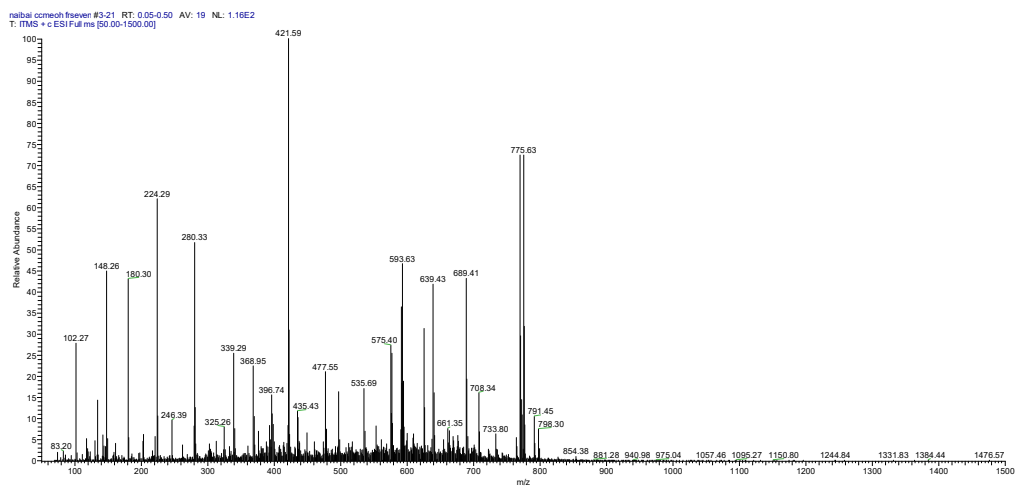

**Figure S29: ESI-MS spectrum of NB4.7 (Cationic mode)**

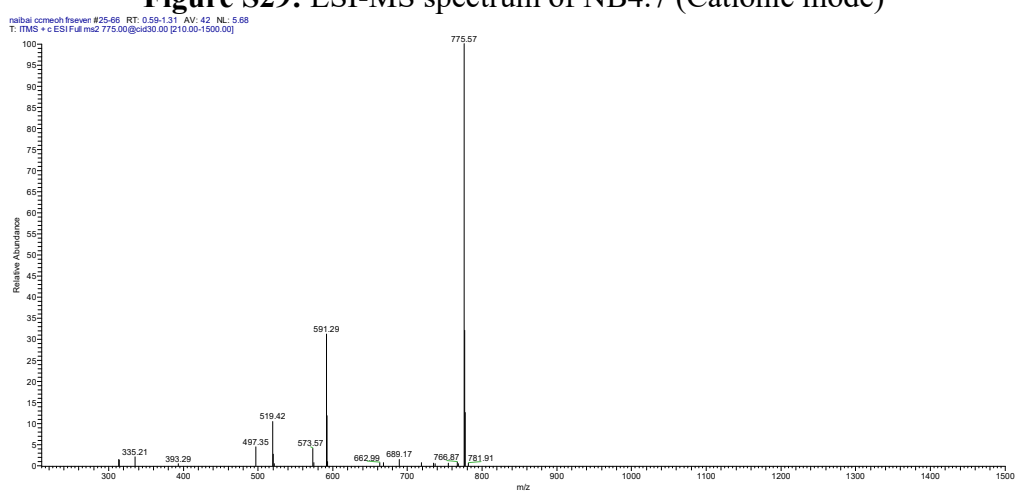

**Figure S30: ESI-MS/MS spectrum of  $m/z$  775 from NB4.7 (Cationic mode)**



|             |                        |                        |                        |               |                                  |
|-------------|------------------------|------------------------|------------------------|---------------|----------------------------------|
| Sample Name | NB4.7                  | Instrument Name        | Instrument 1           | Operator      | WLK                              |
| Inj Vol     | 5                      | IRM Calibration Status | Success                | Data Filename | NB4.7_msms.d                     |
| ACQ Method  | MS Scan_union_APCI-1.m | Comment                | FST, Prof Huang Dejian | Acquired Time | 28/7/2022 5:14:31 PM (UTC+08:00) |

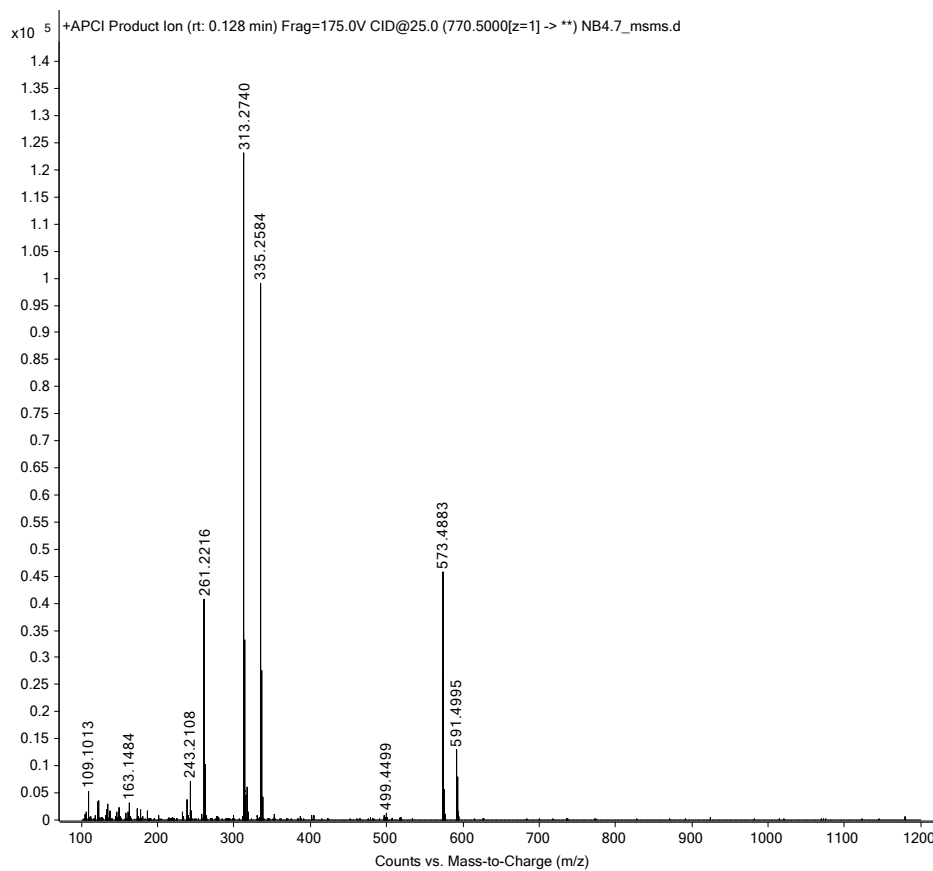

**Figure S31:** APCI-MS/MS spectrum of  $m/z$  775 from NB4.7 (Cationic mode)

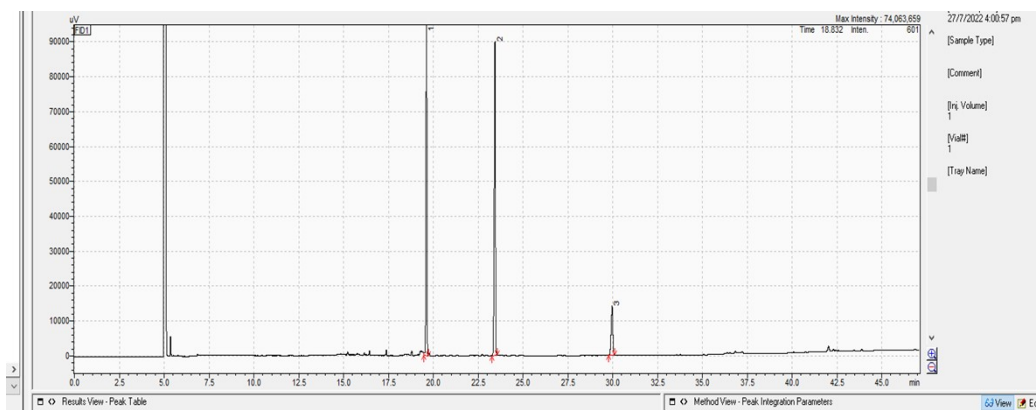

**Figure S32:** GC-MS/FID of NB4.2 after alkaline hydrolysis (Tricosanoic acid is internal standard)

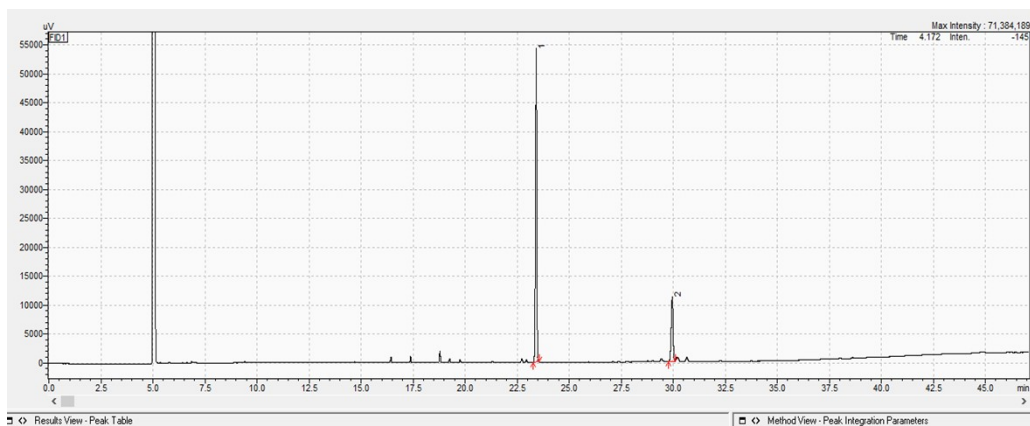

**Figure S33:** GC-MS/FID of NB4.5 after alkaline hydrolysis (Tricosanoic acid is internal standard)

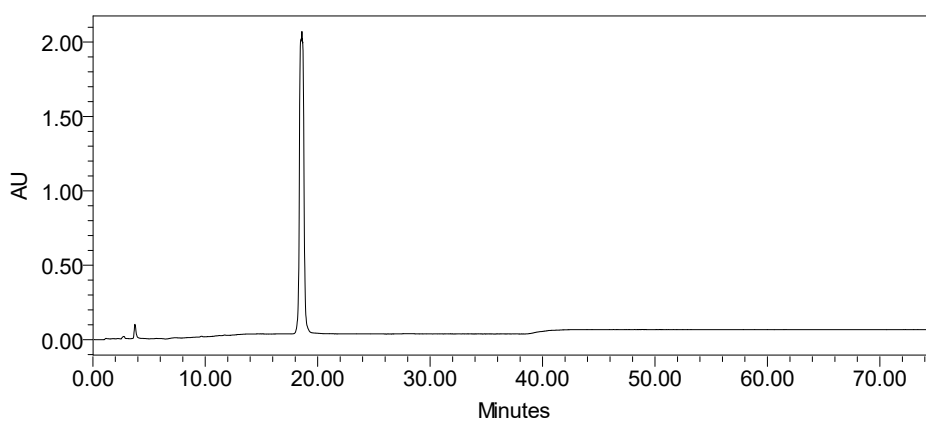

**Figure S34:** HPLC chromatogram of NB4.2 at 210 nm

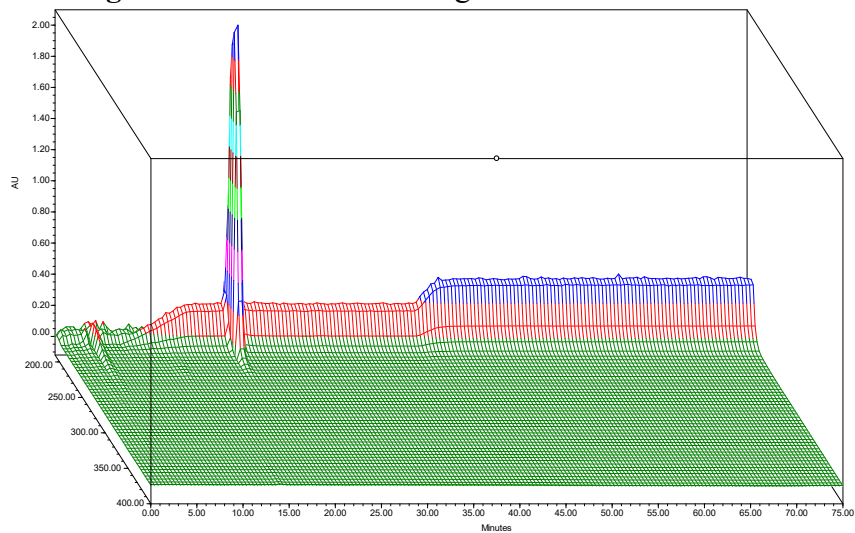

**Figure S35:** 3D HPLC chromatogram of NB4.2

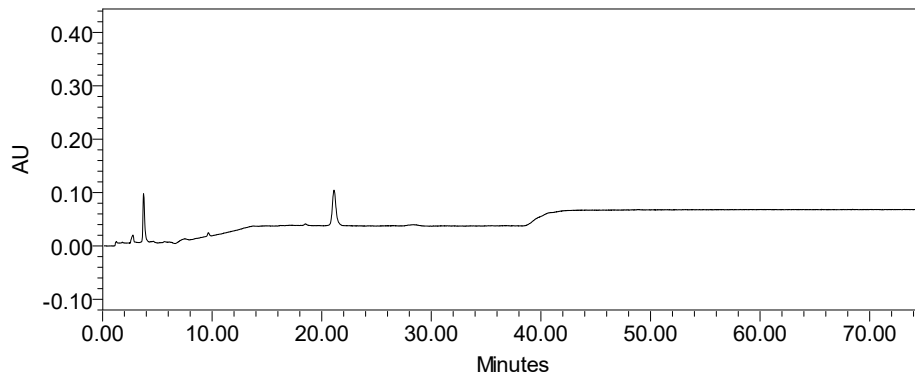

**Figure S36:** HPLC chromatogram of NB4.4 at 210 nm

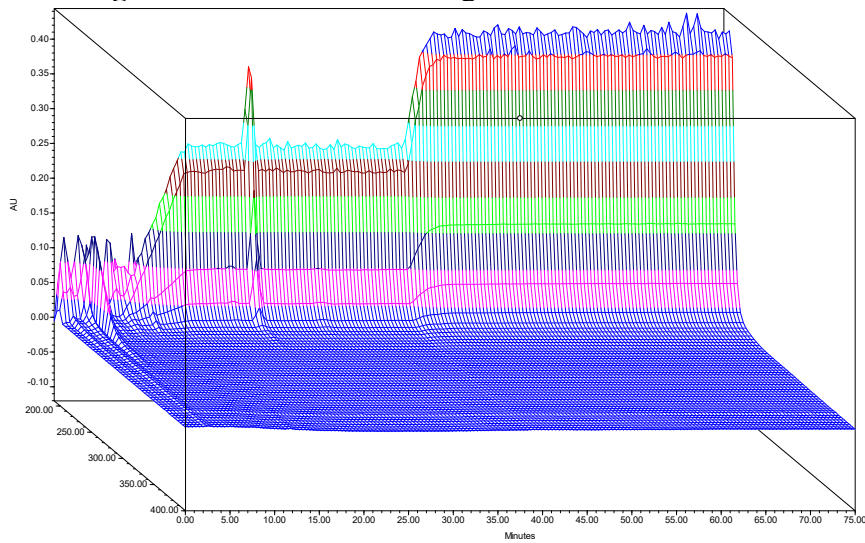

**Figure S37:** 3D HPLC chromatogram of NB4.4

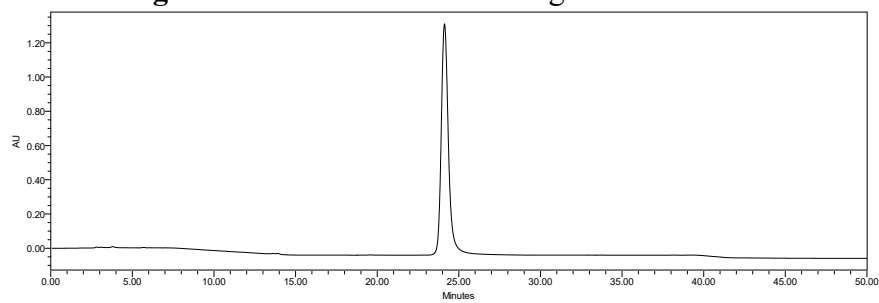

**Figure S38:** HPLC chromatogram of NB4.5 at 210 nm

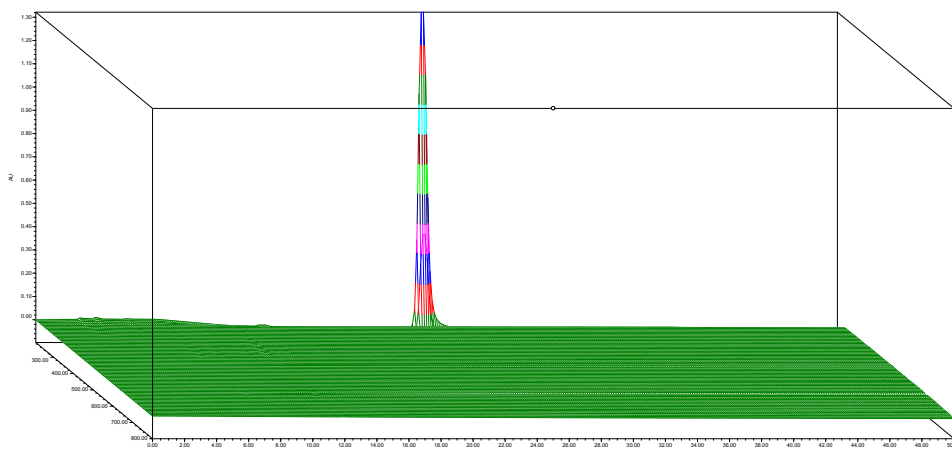

**Figure S39: 3D HPLC chromatogram of NB4.5**

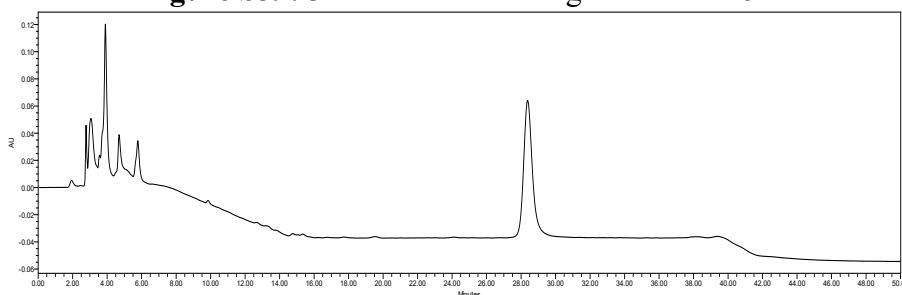

**Figure S40: HPLC chromatogram of NB4.6 at 210 nm**

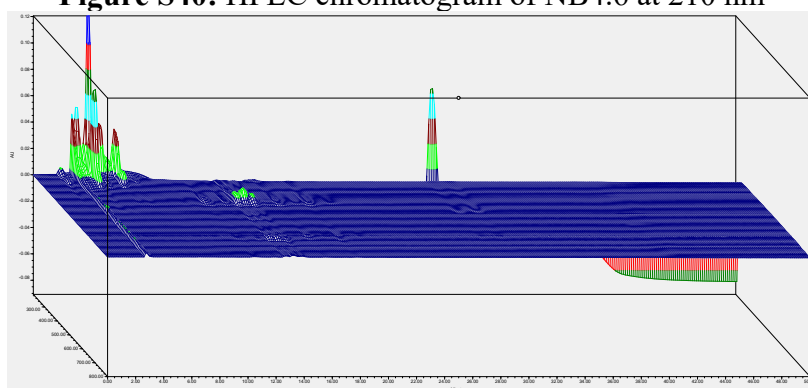

**Figure S41: 3D HPLC chromatogram of NB4.6**

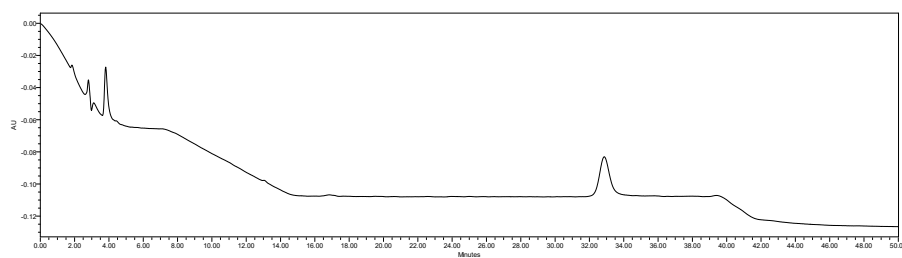

**Figure S42: HPLC chromatogram of NB4.7 at 210 nm**

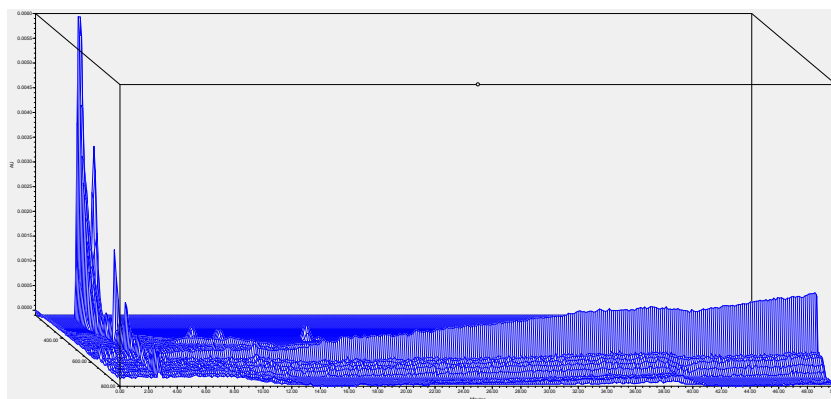

**Figure S43:** 3D HPLC chromatogram of NB4.7
